# Supplementary material for: Systematic pharmacological screens uncover novel pathways involved in cerebral cavernous malformations
Source: PubMed Central journal article supplement (PMC6180302; doi:10.15252/emmm.201809155), 2018-09-04

Fig4D

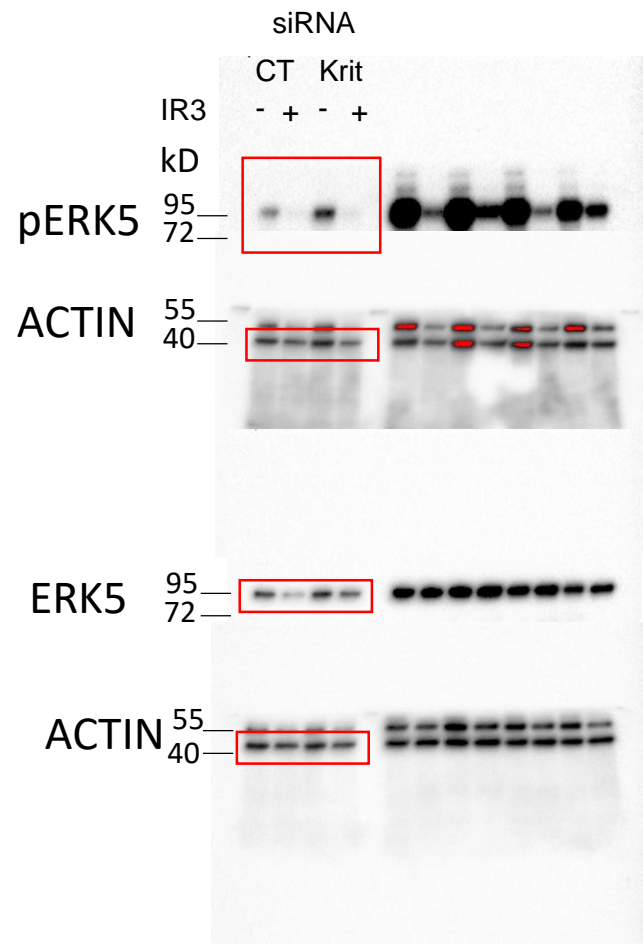

Supplement: EMMM-10-e9155-s012.pdf [file EMMM-10-e9155-s012.pdf]
